# Supplementary figures and images for: Asc Modulates the Function of NLRC4 in Response to Infection of Macrophages by Legionella pneumophila
Source: PubMed Central journal article supplement — mBio. 2011 Jul 19;2(4):e00117-11. doi: 10.1128/mBio.00117-11 (PMC3269931; doi:10.1128/mbio.00117-11), 2011-07-19

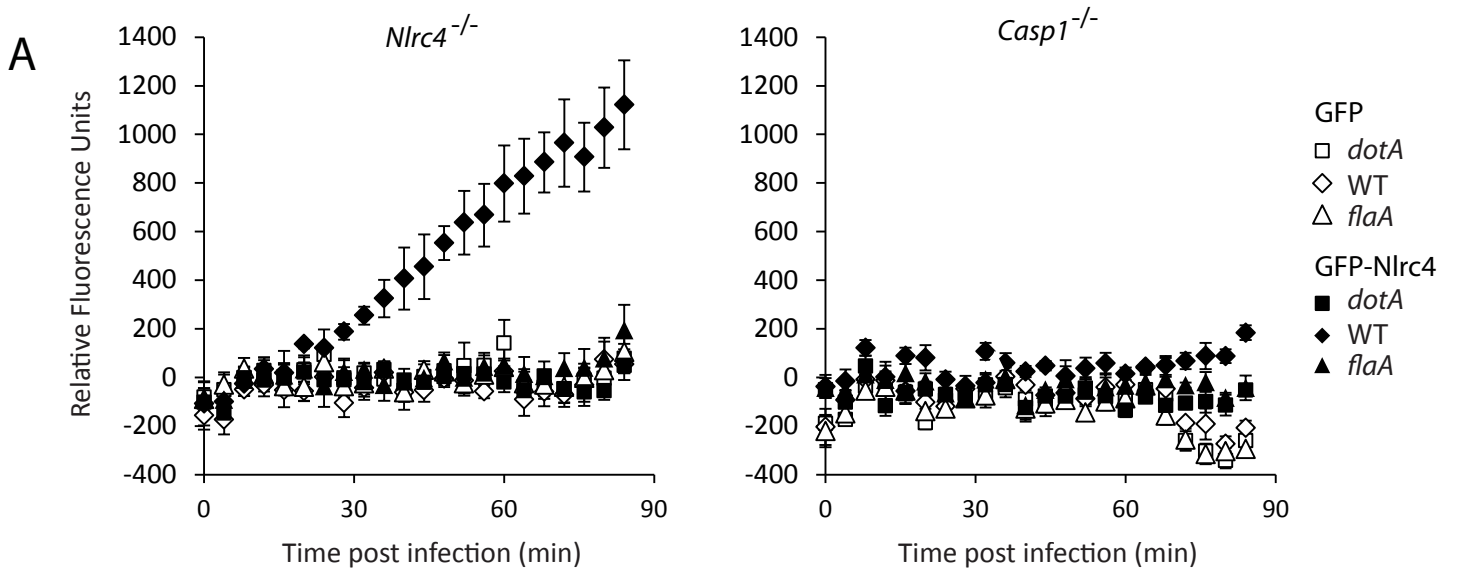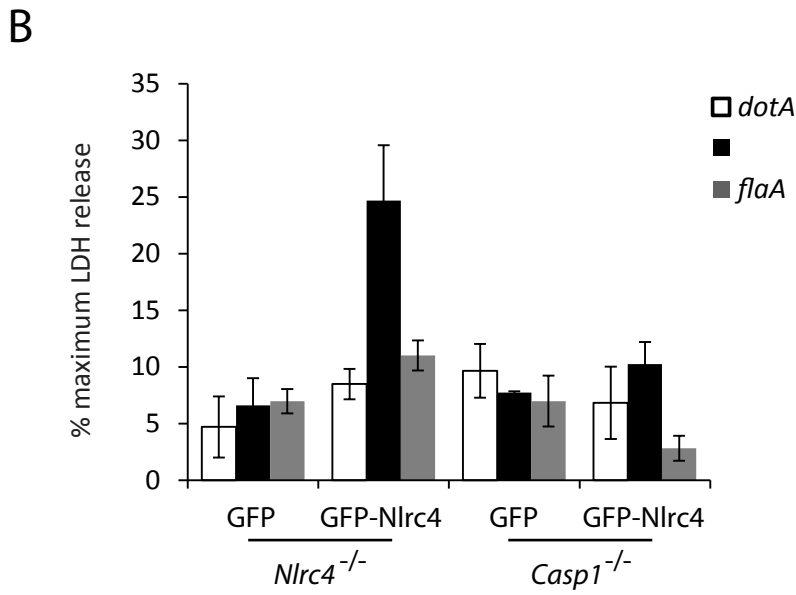

Supplemental Figure 1

Supplement: mbo004111139sf01.pdf [file mbo004111139sf01.pdf]
